## Correction for: Altered regional brain white matter in dry eye patients: a brain imaging study

**Yun-Qing Luo<sup>1,\*</sup>, Rong-Bin Liang<sup>2,\*</sup>, San-Hua Xu<sup>2,\*</sup>, Yi-Cong Pan<sup>2</sup>, Qiu-Yu Li<sup>2</sup>, Hui-Ye Shu<sup>2</sup>, Min Kang<sup>2</sup>, Pin Yin<sup>2</sup>, Li-Juan Zhang<sup>2</sup>, Yi Shao<sup>2</sup>**

<sup>1</sup>Department of Ophthalmology, The Second Affiliated Hospital of Nanchang University, Jiangxi Province Ocular Disease Clinical Research Center, Nanchang 330006, Jiangxi, PR China

<sup>2</sup>Department of Ophthalmology, The First Affiliated Hospital of Nanchang University, Jiangxi Province Medical Imaging Research Institute, Nanchang 330006, Jiangxi, PR China

\*Equal contribution

**Correspondence to:** Yi Shao; **email:** [freebee99@163.com](mailto:freebee99@163.com), <https://orcid.org/0000-0003-1571-2433>

**Original article:** *Aging (Albany NY)* 2022; 14: pp 2805—2818

PMID: [35332110](https://pubmed.ncbi.nlm.nih.gov/35332110/)

PMCID: [PMC9004581](https://pubmed.ncbi.nlm.nih.gov/PMC9004581/)

doi: [10.18632/aging.203976](https://doi.org/10.18632/aging.203976)

**This article has been corrected:** The authors changed the order of the affiliations 1 and 2 and added new affiliation to the first author due to the job transfer. The new affiliations are presented below.

**Yun-Qing Luo<sup>1,2,\*</sup>, Rong-Bin Liang<sup>1,\*</sup>, San-Hua Xu<sup>1,\*</sup>, Yi-Cong Pan<sup>1</sup>, Qiu-Yu Li<sup>1</sup>, Hui-Ye Shu<sup>1</sup>, Min Kang<sup>1</sup>, Pin Yin<sup>1</sup>, Li-Juan Zhang<sup>1</sup>, Yi Shao<sup>1</sup>**

<sup>1</sup>Department of Ophthalmology, The First Affiliated Hospital of Nanchang University, Jiangxi Province Medical Imaging Research Institute, Nanchang 330006, Jiangxi, PR China

<sup>2</sup>Department of Ophthalmology, The Second Affiliated Hospital of Nanchang University, Jiangxi Province Ocular Disease Clinical Research Center, Nanchang 330006, Jiangxi, PR China

\*Equal contribution
